# Supplementary material for: Three-dimensional protein microarrays fabricated on reactive microsphere modified COC substrates
Source: Royal Society of Chemistry journal article supplement (doi:10.1039/d1tb02238e), 2021-12-01
Supplement: d1tb02238e1.pdf [file d1tb02238e1.pdf]

*Supplementary Information for*

**Three-Dimensional Protein Microarray Fabricated on Reactive  
Microspheres Modified COC Substrate**

*Jian Yan,<sup>†,‡</sup> Changwen Zhao,<sup>\*,†,‡</sup> Yuhong Ma,<sup>†</sup> and Wantai Yang<sup>\*,†,‡,§</sup>*

<sup>†</sup>State Key Laboratory of Chemical Resource Engineering, <sup>‡</sup>Beijing Laboratory of Biomedical Materials, <sup>§</sup>Key Laboratory of Biomedical Materials of Natural Macromolecules, Ministry of Education, <sup>†</sup>Key Laboratory of Carbon Fiber and Functional Polymers, Ministry of Education, Beijing University of Chemical Technology, Beijing 100029, China.

Corresponding Author

\* E-mail: [zhaocw@mail.buct.edu.cn](mailto:zhaocw@mail.buct.edu.cn)

\* E-mail: [yangwt@mail.buct.edu.cn](mailto:yangwt@mail.buct.edu.cn)

### Experimental section S1. Calculation of the grafting density of PGMA

The grafting density can be defined as the mass of grafted polymer per unit area, which can be calculated by the following formula:

$$\text{Grafting density } (\mu\text{g}/\text{cm}^2) = (M_1 - M_0) / S \quad (1)$$

Where  $M_0$  and  $M_1$  are the mass of the pristine COC film before and after photografting, respectively;  $S$  is the surface area of COC film.

### Experimental section S2. Synthesis of poly(styrene-*alt*-maleic anhydride) (PSM) copolymer microspheres

The PSM copolymer microspheres with different particle sizes were synthesized through the self-stabilized precipitation (2SP) polymerization. Typically, equimolar styrene and maleic anhydride monomers were added into a flask containing isoamyl acetate with the AIBN as the initiator. The reaction system was purged with  $\text{N}_2$  for 30 minutes to removal inhibitor and then was placed at a certain temperature for a certain time. In the final system, the solid components in the suspension are the PSM microspheres we need, and we do not have to separate them out immediately due to the subsequent operations. The PSM microspheres with different particle sizes could be obtained by adjusting the formula and conditions according to following table S1.

**Table S1.** Reaction formula for synthesizing microspheres of different particle sizes.

| Particle size of obtained microspheres | Styrene  | Maleic anhydride | AIBN     | Isoamyl acetate | Reaction temperature | Reaction time |
|----------------------------------------|----------|------------------|----------|-----------------|----------------------|---------------|
| 350 nm                                 | 0.8238 g | 0.7762 g         | 0.008 g  | 80 mL           | 75 °C                | 1.5 h         |
| 460 nm                                 | 2.471 g  | 2.3285 g         | 0.024 g  | 80 mL           | 75 °C                | 3 h           |
| 630 nm                                 | 5.2 g    | 4.93 g           | 0.0506 g | 100 mL          | 80 °C                | 2 h           |

### Experimental section S3. Preparation of the flat poly(styrene-*alt*-maleic anhydride) brush modified COC (COC-PSM brush) substrate

The COC-PSM brush substrate was prepared by UV-induced grafting polymerization. Firstly, equimolar styrene and maleic anhydride were dissolved in acetone to form the reaction solution with a mass fraction of 70%, which contains the initiator BP with a mass fraction of 2%. Then, 5 $\mu$ L of the reaction solution was injected on the pristine COC film (2 cm $\times$ 2 cm), covered by a piece of BOPP film (4 cm $\times$ 4 cm) to form a “sandwich” structure. Lastly, the “sandwich” structure was irradiated under a high-pressure mercury lamp for 5 min at 254 nm, and the COC-PSM brush substrate was obtained after being extracted in acetone for 30 min.

#### Other Supplementary Figures and Tables

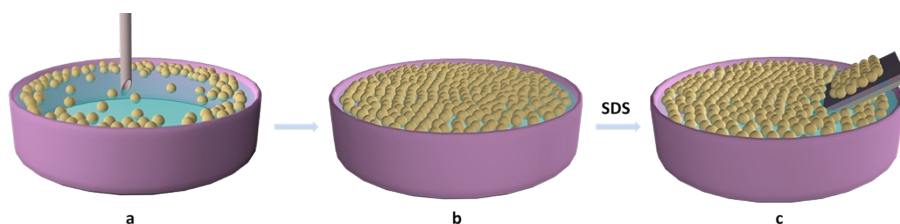

**Fig. S1** Schematic illustration of preparation of single layer PSM microspheres on the modified COC films based on simplified needle tip flow method.

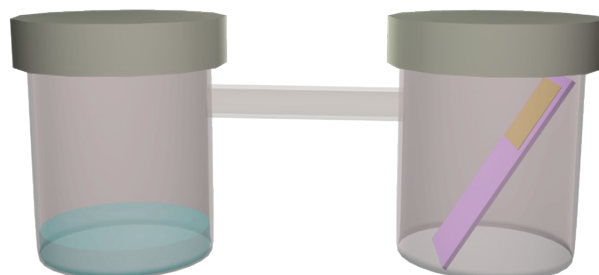

**Fig. S2** Schematic illustration of blocking the residual anhydride groups by gas-solid reaction strategy based on ethylenediamine.

**Table S2** Influence of different solvents and initiators on grafting density.

| Initiators (2 wt%) | Monomer (10 wt%) | Solvent (88 wt%) | Grafting density ( $\mu\text{g}/\text{cm}^2$ ) |
|--------------------|------------------|------------------|------------------------------------------------|
| ITX                | GMA              | Acetone          | 16.06                                          |
| BP                 | GMA              | Acetone          | 24.56                                          |
| BP                 | GMA              | Ethyl acetate    | 30.64                                          |

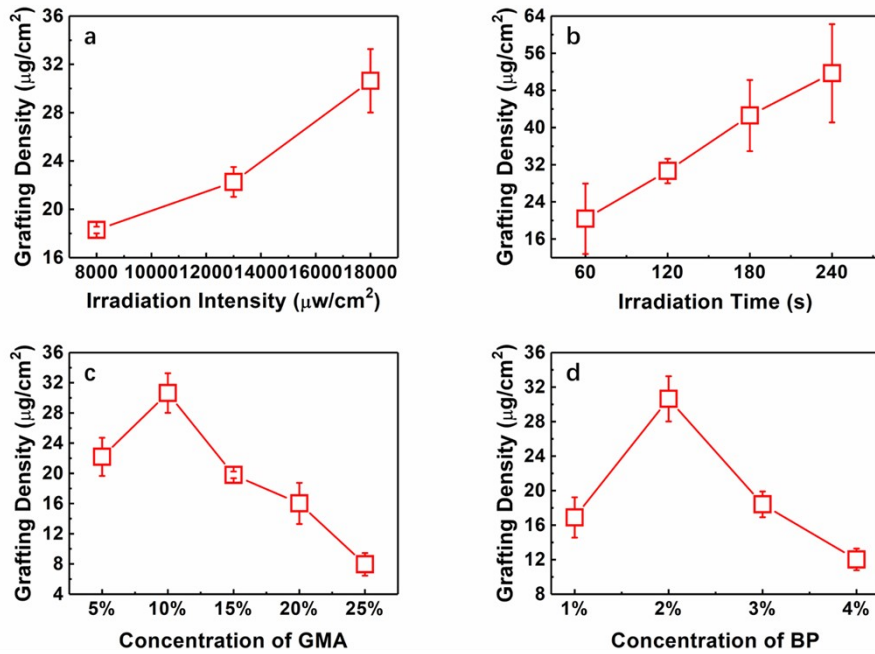**Fig. S3** Relationship between grafting density and (a) light intensity, (b) irradiation time, (c) monomer concentration and (d) initiator concentration.**Table S3** The element contents of COC films before and after modification.

| Sample              | C element | O element | N element |
|---------------------|-----------|-----------|-----------|
| Original COC        | 97.56%    | 2.44%     | -         |
| COC-PGMA            | 73.24%    | 26.76%    | -         |
| COC-NH <sub>2</sub> | 71.14%    | 25.15%    | 3.71%     |

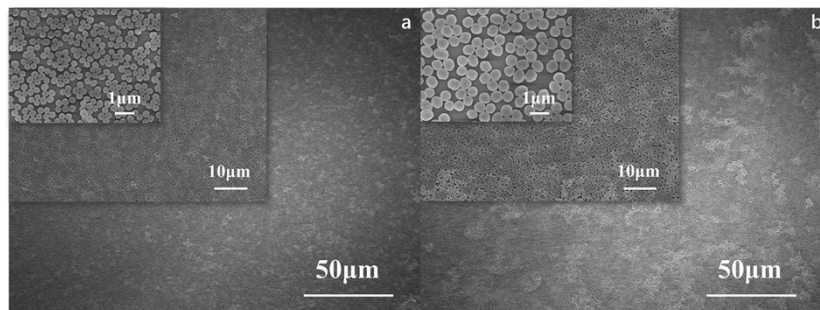

**Fig. S4** The surface morphology of the modified COC film arranged with single-layer PSM microspheres with a particle size of (a) 350 nm and (b) 630 nm.

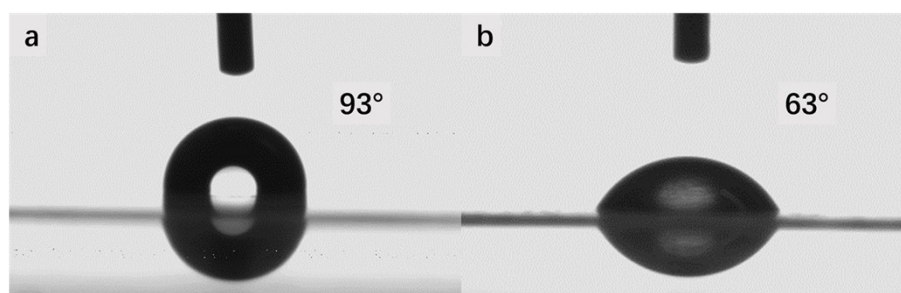

**Fig. S5** The water contact angle of (a) original COC film and (b) COC-PSM film.

**Table S4** Z-factor of the probe protein immobilization.

| Concentration of probe protein | Z-factor |
|--------------------------------|----------|
| 20 $\mu\text{g/mL}$            | 0.70     |
| 40 $\mu\text{g/mL}$            | 0.82     |
| 60 $\mu\text{g/mL}$            | 0.70     |
| 80 $\mu\text{g/mL}$            | 0.96     |
| 100 $\mu\text{g/mL}$           | 0.66     |
| 120 $\mu\text{g/mL}$           | 0.96     |
| 140 $\mu\text{g/mL}$           | 0.83     |
| 160 $\mu\text{g/mL}$           | 0.74     |
| 180 $\mu\text{g/mL}$           | 0.56     |
| 200 $\mu\text{g/mL}$           | 0.63     |

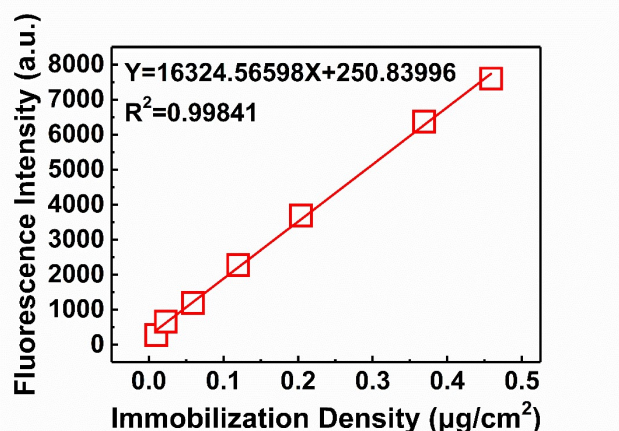

**Fig. S6** The calibration curve for calculation of immobilization density of AF647 IgG.

**Table S5** The RSD values of the immobilization efficiency under different probe protein concentrations.

| Concentration of probe protein | Immobilization Efficiency |         |         | Mean value | RSD value |
|--------------------------------|---------------------------|---------|---------|------------|-----------|
|                                | Batch 1                   | Batch 2 | Batch 3 |            |           |
| 20 µg/mL                       | 69.03%                    | 78.30%  | 72.14%  | 73.16%     | 6.45%     |
| 40 µg/mL                       | 76.63%                    | 71.18%  | 79.09%  | 75.63%     | 5.35%     |
| 60 µg/mL                       | 68.11%                    | 73.00%  | 64.26%  | 68.45%     | 6.40%     |
| 80 µg/mL                       | 67.05%                    | 65.12%  | 62.14%  | 64.77%     | 3.82%     |
| 100 µg/mL                      | 60.89%                    | 66.91%  | 66.48%  | 64.76%     | 5.19%     |
| 120 µg/mL                      | 62.79%                    | 63.18%  | 61.79%  | 62.58%     | 1.15%     |
| 140 µg/mL                      | 58.88%                    | 64.66%  | 65.23%  | 62.92%     | 5.58%     |
| 160 µg/mL                      | 61.09%                    | 63.44%  | 61.62%  | 62.05%     | 1.99%     |
| 180 µg/mL                      | 58.57%                    | 63.81%  | 64.55%  | 62.31%     | 5.23%     |
| 200 µg/mL                      | 61.55%                    | 62.68%  | 53.50%  | 59.24%     | 8.46%     |

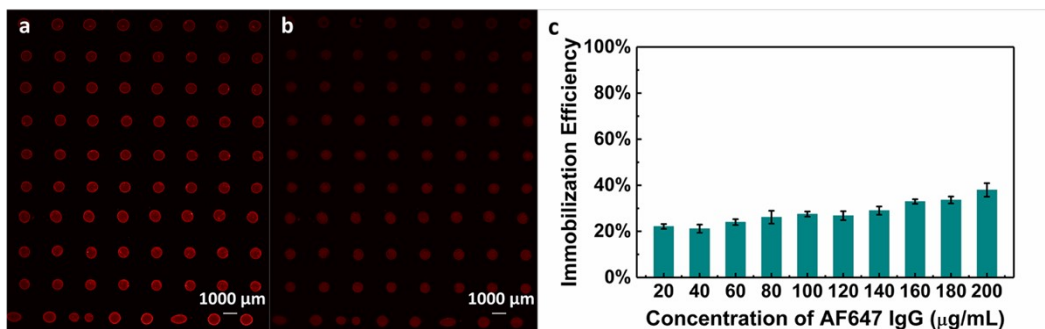

**Fig. S7** Fluorescence images of flat COC-PSM brush microarray (a) before and (b) after washing; The (c) immobilization efficiency of flat COC-PSM brush substrate under different probe protein concentrations.

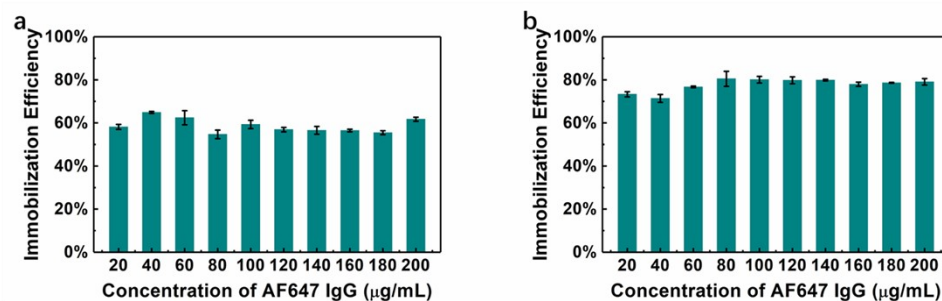

**Fig. S8** The immobilization efficiency of AF647 IgG on COC-PSM substrate with a particle size of (a) 350 nm and (b) 630 nm.

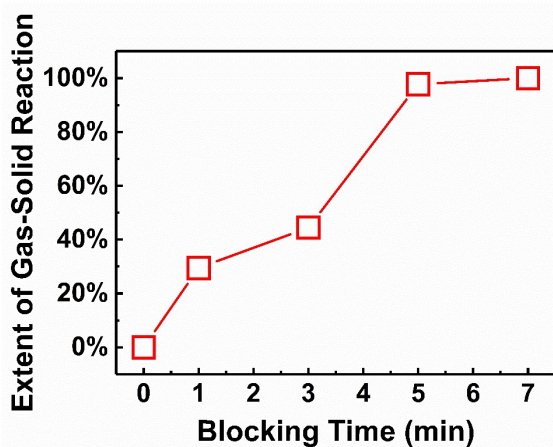

**Fig. S9** The relationship between the extent of gas-solid reaction and blocking time.

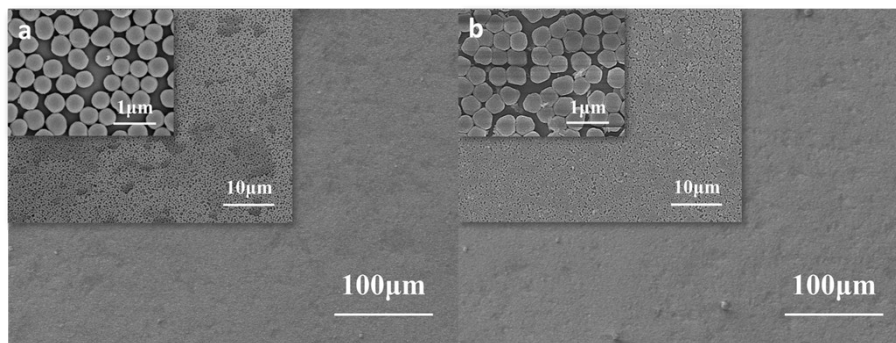

**Fig. S10** The SEM images of COC-PSM-IgG (a) before and (b) after blocking.

**Table S6** Z-factor of the immunoassay of microarray.

| Concentration of probe protein | Z-factor                                |           |          |          |            |            |
|--------------------------------|-----------------------------------------|-----------|----------|----------|------------|------------|
|                                | Concentration of target protein (ng/mL) |           |          |          |            |            |
|                                | 250 ng/mL                               | 100 ng/mL | 50 ng/mL | 25 ng/mL | 12.5 ng/mL | 6.25 ng/mL |
| 120 µg/mL                      | 0.53                                    | 0.55      | 0.46     | 0.35     | 0.28       | 0.34       |
| 140 µg/mL                      | 0.61                                    | 0.46      | 0.72     | 0.54     | 0.43       | 0.16       |
| 160 µg/mL                      | 0.57                                    | 0.57      | 0.77     | 0.43     | 0.58       | 0.36       |
| 180 µg/mL                      | 0.60                                    | 0.80      | 0.63     | 0.55     | 0.51       | 0.55       |
| 200 µg/mL                      | 0.51                                    | 0.70      | 0.80     | 0.53     | 0.64       | 0.72       |

**Table S7** The RSD values of the fluorescence intensity in the immunoassay of microarray.

| Concentration of target protein | Fluorescence intensity |         |          | Mean value | RSD value |
|---------------------------------|------------------------|---------|----------|------------|-----------|
|                                 | Batch 1                | Batch 2 | Batch 3  |            |           |
| 6.25 ng/mL                      | 1970.5                 | 1885.8  | 1824.2   | 1893.50    | 3.88%     |
| 12.5 ng/mL                      | 1115.4                 | 1037.7  | 918.102  | 1023.73    | 9.71%     |
| 25 ng/mL                        | 751.4                  | 689.5   | 691.518  | 710.81     | 4.95%     |
| 50 ng/mL                        | 555.9                  | 485.9   | 457.135  | 499.65     | 10.17%    |
| 100 ng/mL                       | 389.6                  | 410.7   | 399.5875 | 399.96     | 2.64%     |
| 250 ng/mL                       | 378.9                  | 380.8   | 357.296  | 372.33     | 3.51%     |
